# Supplementary material
Source: Springer Nature journal article supplement (https://www.springermedizin.de/resource/supplementary/12885_2008_1298_MOESM6_ESM.pdf/9471682)

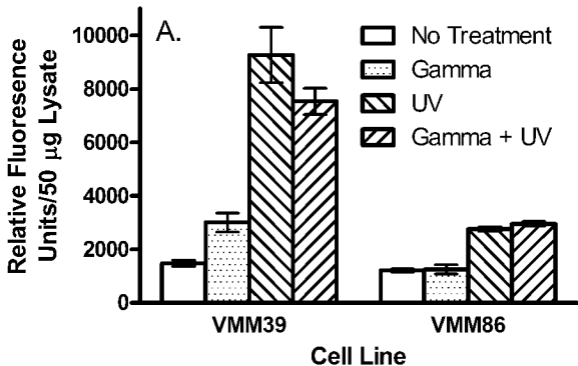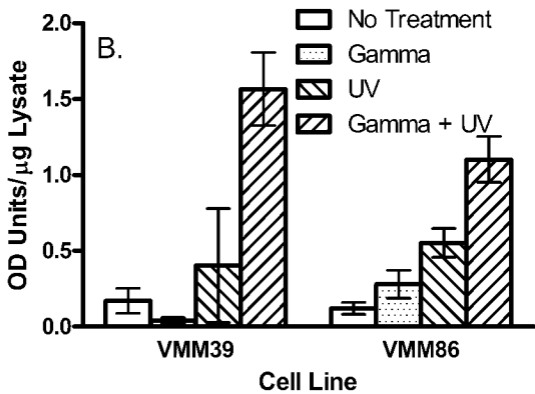

Supplement: MOESM6 [file 9471682]
